1 *Original Research & Review*

2  
3 **Is the genomics cart before the restoration ecology horse?**

4 **Insights from qualitative interviews and trends from the literature**

5  
6 Jakki J. Mohr<sup>1</sup>, Peter A. Harrison<sup>2</sup>, Jessica Stanhope<sup>3</sup>, Martin F. Breed<sup>4</sup>

7  
8  
9 <sup>1</sup>College of Business, Institute on Ecosystems, University of Montana, Missoula, MT,  
10 U.S.A. 59812; <sup>2</sup>School of Biological Sciences and Australian Research Council  
11 Training Centre for Forest Value, University of Tasmania, Hobart, Tasmania,  
12 Australia 7001; <sup>3</sup>School of Allied Health Science and Practice, The University of  
13 Adelaide, North Tce, Adelaide, SA, Australia 5005; <sup>4</sup>College of Science and  
14 Engineering, Flinders University, Bedford Park, SA, Australia 5042.

15  
16 **Corresponding author:** Martin F. Breed, Tel: +61 8 8201 7877, Email:

17 [martin.breed@flinders.edu.au](mailto:martin.breed@flinders.edu.au), College of Science and Engineering, Flinders  
18 University, Bedford Park, SA, Australia 5042

19  
20 **KEYWORDS:** conservation biology, genomics, innovation, restoration ecology

21  
22 **ORCID:** JJK 0000-0003-4938-8440, PAH 0000-0002-3502-0242, JS 0000-0002-  
23 6657-3317, MFB 0000-0001-7810-9696

25 **Author Contributions:** Conceptualization: JJM, PAH, MFB; Data curation: JJM,  
26 PAH, JS, MFB; Formal analysis: JJM, PAH, JS, MFB; Funding acquisition: JJM,  
27 MFB; Investigation: JJM, PAH, JS, MFB; Methodology: JJM, PAH, JS, MFB; Project  
28 administration: JJM, PAH, MFB; Resources: N/A; Software: N/A; Supervision: N/A;  
29 Validation: N/A; Visualization: PAH, JS, MFB; Writing – original draft: JJM, PAH, JS,  
30 MFB; Writing – review & editing: JJM, PAH, JS, MFB.

31

32

33 **ABSTRACT**

34 Harnessing the power of new technologies is a vital component to achieving the  
35 global imperative to restore degraded ecosystems. We explored the potential of  
36 genomics as one such tool. We aimed to understand the barriers hindering the  
37 uptake of genomics, and how to overcome them, via exploratory interviews with  
38 leading scholars in both restoration and its sister discipline of conservation – a  
39 discipline that has successfully leveraged genomics. We also conducted a  
40 systematic mapping review to explore publication trends that have used genomics to  
41 address restoration and conservation questions. Our qualitative findings revealed  
42 multiple tensions in harnessing genomics. For example, scholars without genomics  
43 experience felt pushed to use genomics prematurely. In contrast, scholars with  
44 genomics experience emphatically emphasized the need to proceed cautiously. Both  
45 genomics-experienced and less-experienced scholars called for case studies to  
46 demonstrate the benefits of genomics in restoration. However, our qualitative data  
47 contrasted with our systematic mapping review findings, which revealed 70  
48 restoration genomics studies in total, particularly studies using environmental DNA  
49 as a monitoring tool. We provide a roadmap to facilitate a more rapid uptake of  
50 genomics into restoration, which should help the restoration sector meet the  
51 monumental task of restoring huge areas to biodiverse and functional ecosystems.  
52

## 53 BACKGROUND

54

55 *“We’re looking for any tools available that can help us find solutions [to*  
56 *understanding ecosystem processes and functions]. And, genomics provides,*  
57 *you know, a new set of glasses to look at and understand our systems, and*  
58 *therefore, to seek solutions from”* (Scholar 4 in our study).

59

60 Humans are now the dominant force in nature, having caused substantial  
61 degradation to ecosystems globally and significant biodiversity loss [1, 2]. Ecosystem  
62 restoration is tasked with reversing humanity’s ecological footprint by returning and  
63 reinstating lost ecosystem services, ecological processes and biodiversity [3], the  
64 scale of which is enormous, as highlighted by the United Nations declaration of the  
65 *Decade on Ecosystem Restoration* (<https://www.decadeonrestoration.org/>). The  
66 global community have pledged to restore over 350 million hectares of degraded  
67 land by 2030 under The Bonn Challenge [4]. Thus, there is great urgency to the  
68 upscaling of ecological restoration interventions, from local levels to entire  
69 landscapes.

70

71 Restoration ecology is experiencing a monumental transformation as it wrestles with  
72 challenges posed by climate change, ambitious restoration mandates, and social  
73 and political considerations. Tackling such global challenges is no easy feat and  
74 requires innovation, science-informed practice, and drawing knowledge from sister  
75 disciplines for insight [5-7]. New techniques and methods, such as genomics, offer  
76 potential to address restoration challenges [8], but they also invite debate and  
77 controversy. Pioneering techniques, like genomics, may be viewed as unproven, and

78 therefore risky by the majority of the field [9], resulting in a significant lag on the  
79 uptake of innovation.

80

81 Disciplines often experience controversy when new approaches challenge existing  
82 paradigms and existing practices [10]. Changes in methods can take years to unfold,  
83 as information gets disseminated, new practitioners trained, and the conventional  
84 wisdom retired. In addition to barriers from status-quo thinking, innovations may  
85 require significant financial investments that are often perceived as risky given that  
86 the viability of the innovation may not be immediately realised [11]. Indeed, in some  
87 situations, new models and paradigms may prove to be less beneficial than originally  
88 expected, have unintended consequences, be un-scalable, or be superseded by  
89 even better techniques [12]. Further, innovations often require collaborations across  
90 disciplinary and geographic boundaries, which can present barriers to progress and  
91 delayed uptake [13].

92

93 Despite facing many barriers to its application, genomics has made a considerable  
94 impact on the field of conservation [14-17]. Among the first applications in  
95 conservation was population genomics [18], which offered conservation scientists  
96 and practitioners detailed insight into species lineages and population demographics.  
97 Such data are central to precise delineation of conservation units and key to  
98 conservation management [19, 20]. Genomics also has been applied to detect and  
99 monitor species of conservation concern [21].

100

101 In contrast, restoration is yet to leverage genomics to a similar degree [8]. However,  
102 to achieve its ambitious targets, restoration must adopt new techniques and

103 approaches [6, 22]; genomics may be one such technique. Genomics is a valuable  
104 and cost-effective technology that, if used appropriately, could greatly advance  
105 restoration [8]. To better understand the barriers hindering the uptake of genomics,  
106 and how to overcome them, we aimed, firstly, to understand how leading scholars  
107 view the potential role of genomics in restoration ecology. We also explored what  
108 insights scholars in restoration ecology's sister discipline of conservation could offer,  
109 a field that has leveraged genomics to address many important issues [19, 23].  
110 Secondly, we explored the trends in publications that have used genomics to  
111 address restoration or conservation. Addressing these two objectives, we provide a  
112 roadmap to facilitate and leverage genomics to meet global restoration targets.

113

## 114 **METHODS**

### 115 *Qualitative interviews*

116 To better understand the nexus between genomics and restoration, we used  
117 qualitative research. Qualitative research methods are appropriate when the  
118 phenomenon of interest is complex or poorly understood [24, 25], and such methods  
119 are used in both restoration ecology and conservation [26, 27]. We used in-depth,  
120 semi-structured interviews to explore scholars' perceptions of (a) the current and  
121 potential role of genomics in restoration and conservation, and (b) the barriers to and  
122 enablers of using genomics in these disciplines.

123

124 We used purposeful sampling, a method that identifies study participants based on  
125 their ability to provide rich information on the phenomenon of interest. We identified  
126 both restoration ecology and conservation scholars based on their background and  
127 experience [28]. We sought scholars of different career stages (based on their

128 publication records and scholarly reputations; Table 1), and scholars who relied  
129 extensively on genomics and those who do not. Unlike quantitative research, the  
130 sample size needed for qualitative research depends on the nature of the research  
131 question, with a focus on sample adequacy rather than statistical power. The  
132 adequacy of sampling is usually assessed in terms of 'saturation' [29], where  
133 researchers continue interviewing until no new information emerges [i.e. until  
134 saturation is reached; 30].

135

136 Our in-depth interviews included four senior scholars with  $\geq 30$  years' experience,  
137 three mid-career scholars with 10-29 years' experience, and two early-career  
138 scholars with  $< 10$  years' experience (Table 1). Of the respondents, six were  
139 genomics experts, while three were familiar with genomics, but did not conduct  
140 genomics research themselves. Four respondents worked primarily in restoration  
141 ecology, two primarily in conservation, and three conducted research that spanned  
142 both conservation and restoration. Each respondent was assigned a number for  
143 anonymity. Interviews were conducted July-September 2019.

144

145 Prior to the interview, a brief script was read to the respondent, adhering to informed  
146 consent guidelines, per Institutional Review Board standards (lead author's  
147 institution #144-19). An interview guide (see Appendix 1 in the Supplementary  
148 Information for details) ensured comparability across interviews. Respondents  
149 answered questions about their academic background, their understanding of  
150 genomics, how genomics was or might be used in their research field, as well as  
151 about their perceptions and experience regarding barriers and enablers. All  
152 interviews concluded with a set of reflective questions related to cross-pollination

153 from conservation to restoration ecology, as well as advice to “restoration ecologists  
154 interested in increasing the uptake of genomics”. The interviews had a  
155 conversational quality; respondents guided the flow of the discussion. Three  
156 researchers participated in all interviews, with one of the team serving as the lead  
157 interviewer. The other two researchers were invited to interject questions to clarify  
158 and probe at selected spots in the interview. This semi-structured approach provided  
159 the benefits of organization and flexibility, while minimising the risk of interviewer-  
160 induced bias [31]. Each interview lasted about one hour, was recorded, and  
161 professionally transcribed verbatim.

162

163 Qualitative data are analysed using an iterative process to identify themes emerging  
164 from the data [32]. The three research team members involved in the interviews  
165 each analysed three-to-four transcripts in detail for insights and themes. Based on  
166 this iterative process, data were organized into key themes [i.e. 'thematic analysis';  
167 33]. We then triangulated these themes by sharing our individual interpretations,  
168 discussing discrepant views, and cross-checking themes against the transcripts.  
169 These findings were then reflected back to the research participants in a written form  
170 to ensure the themes resonated with their experience and perceptions. The themes  
171 that survived this validation process are discussed in the results below. Data  
172 excerpts illustrate specific findings and provide empirical evidence for the themes.

173

#### 174 *Systematic mapping review*

175 To determine the characteristics of studies that use genomics in restoration ecology  
176 or conservation (see Box 1 for definitions), we undertook a systematic mapping  
177 review. Systematic mapping reviews are used to categorise and map the existing



178 literature, utilising a replicable systematic search [34]. We conducted the systematic  
179 search on March 1, 2020 to identify all peer-reviewed articles published in English  
180 language that used genomics within conservation or restoration ecology. The search  
181 was performed in Web of Science Core Collection and Scopus (see Appendix 2 for  
182 search terms).

183

184 Results from the database searches were exported into Endnote X9 for  
185 management. Within Endnote, duplicates were manually removed, then the titles and  
186 abstracts were screened by two authors for inclusion/exclusion, based on  
187 predetermined criteria (Box 1). The full texts of all remaining articles were obtained  
188 and screened against the same criteria. Where there were uncertainties regarding  
189 inclusion of a study, another author independently assessed the study.

190

191 The following data were manually extracted from all included articles into a Microsoft  
192 Excel spreadsheet: country of the study, year(s) of data collection, publication year,  
193 whether the study related to conservation and/ or restoration ecology (based on the  
194 definitions in Box 1), and the genomic methods used (e.g., eDNA, population  
195 genomics). A second author independently coded the data from any study where the  
196 other author was uncertain.

197

## 198 **RESULTS AND DISCUSSION**

199 Our qualitative research findings revealed that scholars with high levels of  
200 experience in using genomics expressed different perspectives on harnessing  
201 genomics in restoration compared to scholars with less genomics experience. These  
202 differences were organized into three inter-related areas of tension – academic

203 training and background, methodological, and philosophical – which we discuss in  
204 turn below. The insights gained from these qualitative data prompted us to explore  
205 the trends in the literature via a systematic search to better understand where and  
206 how genomics tools were being applied in conservation and restoration, which are  
207 discussed following the qualitative findings.

208

### 209 *Qualitative Findings*

210 Differences in academic training and background: Scholars experienced in genomics  
211 had background training in genetics and/or evolutionary biology. As Scholar 2  
212 expressed, the understanding of genetics “*and all that stuff about small populations*  
213 *and genetic bottlenecks is well-embedded in conservation thinking and much less so*  
214 *in restoration.*” In contrast, “*the restoration field is more ecologist-driven than*  
215 *geneticist driven*” (Scholar 8). Scholars less experienced in genomics acknowledged  
216 this field-based training difference and expressed concerns about the stereotype of  
217 restoration “*as a gardening exercise*” (Scholar 3). To harness genomics, restoration  
218 ecologists require at least some training in genetics and/or evolutionary biology, and  
219 it was noted that, without this training, experts expressed concern about how  
220 “*anyone who manages an ecosystem could do so effectively*” (Scholar 6).

221 Paradoxically, the more classically-trained restoration ecologists expressed concern  
222 about genomics scholars ‘overpromising’ what genomics can do for the field, that  
223 genomics scientists “*have the hammer and are looking for the nails*” (Scholar 3).

224

225 Another key difference in training voiced by genomics experts is their proficiency in  
226 handling the ‘big data’ aspects of high-throughput sequencing and requisite  
227 bioinformatics. Genomics scholars describe themselves as “*total data nerds* [who]

228 *dive into two terabytes of data with great enthusiasm (Scholar 8).*” Scholar 9 noted  
229 that traditional restoration ecologists may be “*unprepared for the fact that they can’t*  
230 *open this data in Excel and you can’t eyeball it...It requires specialist expertise to be*  
231 *able to handle this sort of data.*”

232

233 Methodological differences: Three clear differences emerged between more and less  
234 experienced scholars regarding the interpretation of results from genomics data and  
235 the experimental design underlying the data. First was the importance of a rigorous  
236 research design. Scholars who were not as experienced using genomics expressed  
237 concern that genomics researchers might be putting the “*cart before the horse*”  
238 (Scholar 3), that *genomics is important but it’s not everything*” (Scholar 7: “*People*  
239 *who embrace new technologies can forget the old school methods of just growing*  
240 *plants in a glasshouse*”). However, the experienced genomics scholars themselves  
241 noted the need to ensure defensible research designs. Scholar 5 noted that “*we’re*  
242 *still analysing and trying to figure out the best analyses to take for these big ...*  
243 *genomics studies. The challenge is, even with the expertise, getting the analysis*  
244 *right, making decisions around which comparisons and what analysis do you run*”.

245

246 The second methodological difference concerned the confidence in drawing  
247 conclusions based on methods developed using model organisms. The field of  
248 conservation benefited from publicly-available genomic resources, such as  
249 assembled and annotated genomes stemming from human medicine or agriculture  
250 [35]. “*Most of the first examples of using genomics in conservation benefitted from*  
251 *agriculture, where they had already collected and analysed the genomic information*”  
252 (Scholar 1). Experienced genomics scholars were comfortable using these model

253 organisms. Scholar 5 stated, “*As an evolutionary biologist, I can say fundamentally,*  
254 *how genetic diversity drives population dynamics and persistence is universally the*  
255 *same, regardless of taxa.*” However, Scholar 5 expressed concern that less  
256 experienced genomics scholars “*are reticent to accept arguments about the*  
257 *importance of considering genetic diversity when that data comes from model*  
258 *organisms. [They wonder how] does that translate to my particular species or my*  
259 *ecological context?*”

260

261 A final methodological difference was the ability to use genomics data to understand  
262 genetic variation between populations that is relevant to restoration. On the one  
263 hand, experienced genomics scholars were comfortable using genomics to  
264 understand the genetic basis of adaptation. For example, Scholar 9 said, “*As much*  
265 *as anything, I’ve been following my nose; genomics can help us take more apart and*  
266 *start to understand adaptive differences*”. In contrast, restoration ecologists with less  
267 experience in genomics expressed worry and concern about the inability to draw  
268 precise conclusions from genomics data. For example, one suggested that genomics  
269 allows researchers to describe important genetic differences between plant  
270 populations faster, but “*we still need to ascribe functional significance to those*  
271 *differences*”, stressing the need for classic experiments with control groups in order  
272 to “*close the loop on the functional impacts of genomics findings*” (Scholar 3).

273

274 Philosophical differences: The last difference that emerged surrounded the scholars’  
275 attitudes and beliefs about embracing both the upside potential and downside risks  
276 that come with using genomics in restoration, including concerns about using  
277 genomics to surface new knowledge. On the one hand, scholars experienced in

278 genomics evinced scepticism and caution on the use and interpretation of genomics  
279 data in order to avoid “*putting the cart before the horse*” (Scholar 4), with explicit  
280 recognition of the work yet to be done to validate genomics’ potential and the need to  
281 explore the potential of genomics even if it does not pan out as expected. On the  
282 other hand, scholars with less genomics experience were more hesitant to  
283 experiment with unknown protocols and were concerned about the ambiguity  
284 surrounding unknown aspects of genomics. Less experienced scholars expressed  
285 the perspective that genomics was ‘over-hyped’ and perhaps over-promised what it  
286 could deliver. These scholars with less experience in genomics characterized other  
287 restoration ecologists as being risk averse: “[some] *restoration people don’t like*  
288 *anything new at all...*” (Scholar 2), as well as possible concerns about how “*scary*  
289 *and troublesome*” genome editing is: “*if you unleash this technology into nature,*  
290 *you’re unleashing the ‘dogs of hell’ and it’s all going to be bad*” (Scholar 2).

291  
292 Despite the need for “*creative thinkers, people willing to take the chance, to jump*  
293 *upon those new methods, and think outside the box*” (Scholar 8), experienced  
294 genomics scholars simultaneously acknowledge the need to temper the hype.  
295 Scholar 7 said, “*There’s a lot of scepticism on the method [genomics] but there’s*  
296 *also a lot of excitement—which we’re trying to temper by saying we need to do a lot*  
297 *of research to actually show how well this is going to work.*” Scholar 7 continued,  
298 “*People are running to it because it’s new and shiny...we need to set realistic*  
299 *expectations about how well genomics is going to work, how much work we need to*  
300 *put in to prove how well it’s going to work.*” Scholar 8 agreed with the need for  
301 tempering: “*I understood how difficult genomics was, how uncertain it was, and I was*  
302 *like, ‘Hold on. Pump the brakes. I’ve worked really hard to get through to the more*

303 *senior people the difficulty and the uncertainty surrounding these data...It's not a*  
304 *silver bullet. There's so much we need to do to make it a usable and reliable,*  
305 *trustworthy tool for restoration assessment."*

306

307 Shared views: A final set of qualitative findings regards similar views. Firstly, both  
308 genomics experts and those less experienced with genomics stressed the need to  
309 *"build up enough case studies to demonstrate positive outcomes in terms of the*  
310 *success of particular restoration programs"* (Scholar 5). This scholar emphasized the  
311 importance of identifying and validating *"current use cases where genomics could*  
312 *offer tangible value in research today and addressing pressing questions now."*

313 Similarly, Scholar 3 noted that *"the greatest challenge for genomics is to*  
314 *demonstrate 'runs on the board'"*, to show that it is a cost-effective tool that provides  
315 relevant answers to restoration questions that, without which, practitioners may  
316 make less optimal management decisions. We note that this stated desire for case  
317 studies contrasts with the findings from our systematic mapping review (see below),  
318 which counted 70 studies that leverage genomics to address restoration issues—  
319 evidence of the clear interest in using genomics in restoration ecology. In addition,  
320 the interviewed scholars emphasized the need for greater education and training  
321 regarding what genomics is, the types of research questions it can usefully address  
322 today, and generally, building capacity, skills and knowledge.

323

324 Moreover, scholars emphasized the importance of collaboration: between  
325 conservation biologists and restoration ecologists, between classically-trained  
326 restoration ecologists and genomics experts, and between practitioners and  
327 scientists. Scholars 3, 4, and 6 each emphasised the benefits of interdisciplinary

328 approaches and collaborative teams comprising people with very distinct skill sets.  
329 Scholars 5 and 7 noted that collaborations between practitioner and scientists are as  
330 important as collaborations between genomics experts and classically-trained  
331 restoration ecologists. Scholar 5 believed that having joint discussions with  
332 practitioners regarding the design of field-based studies could advance uptake and  
333 demonstrate the benefits genomics might offer in certain areas of practice (e.g.,  
334 assessing soil function; for ecological monitoring) to close the gap between science  
335 and practice. However, Scholar 3 worried that scientists see the value in the tool, but  
336 practitioners will not. Indeed, a less experienced genomics scholar described “*the*  
337 *genomics people*” as “*the guys in the other room*”, who “*have to demonstrate that*  
338 *they understand what the restoration community does*” to bring the conversation  
339 about genomics in restoration “*into the fold.*” This us-them distinction could stymie  
340 collaborative efforts.

341

342 We advocate for thinking proactively about how to ensure that genomics does not  
343 widen the gap in adoption by practitioners, as collaboration alone is likely to be  
344 insufficient, an issue raised previously in discussions of the value and uptake of  
345 genomics in conservation [19]. Without improved training in evolutionary biology and  
346 genetics, restoration ecologists may find it difficult to harness genomics to address  
347 critical questions in climate change adaptation, ecosystem resilience and soil health,  
348 for example. Scholar 7, a genomics expert, stated, “*Genomics complements*  
349 *traditional approaches. We’ve got to work together with people who use traditional*  
350 *approaches, work side-by-side with them. Our work will feed into theirs and their*  
351 *work will feed into ours. Together, we will make it better and, you know, have better*  
352 *restoration outcomes for the world.*”

353

354 *Systematic Mapping Review*

355 Our systematic search identified 1845 unique articles, 176 of which met our inclusion  
356 criteria and were included in our review (see Appendix 3 for the flow chart of study  
357 inclusion/exclusion; full details of all included papers are in Appendix 4). Based on  
358 the field definitions we used in our review (Box 1), 106 articles were classified as  
359 conservation only, 35 were restoration only, and another 35 had results applicable to  
360 both conservation and restoration. The studies that span both conservation and  
361 restoration highlight the potential for bridging the discourses between the two  
362 disciplines as identified above (see “Differences in academic training and  
363 background”). Indeed, collaborations between the two disciplines can help diffuse  
364 the use of genomics and knowledge more broadly.

365

366 The finding of 35 studies that use genomics in restoration (in addition to the 35 that  
367 span both disciplines) contrasts with the qualitative data that emphasized the need  
368 for “*runs on the board*” and “*case studies of restoration using genomics*”. Distilling  
369 the reasons for this discord is complex; perhaps the studies employing genomics  
370 may not yet represent a viable approach for the restoration discipline. Alternatively, it  
371 is possible that ecology scholars focus their literature reading within their own area of  
372 expertise and are not exposed to genomics research [36]. Or perhaps the lexicon  
373 and presumed knowledge that complicate new technologies may hinder the  
374 recognition of value that genomics may offer. Regardless of the reasons, the need  
375 for relevant and understandable case studies was voiced by both less and more  
376 experienced genomics scholars. Box 2 provides broadly-applicable examples that  
377 illustrate the use of genomics in a restoration context. The cross-pollination of



378 specialist journals in these disciplines offer a further potential to increase the visibility  
379 of genomics in restoration.

380

381 The earliest application of genomics in conservation or restoration that we detected  
382 in our dataset was 2008 [37], followed by a period of very few studies between 2009  
383 to 2012, after which there was an exponential increase in studies applying genomics  
384 in both restoration and conservation (Figure 1). Most studies were published  
385 between 2018-2020 (59 conservation, 26 restoration, 21 conservation and  
386 restoration). This temporal trend appears consistent with other review studies on  
387 conservation genomics [38]. While we counted more studies that used genomics to  
388 address conservation issues than restoration, the temporal trend showed a rapid  
389 increase in restoration studies that used genomics over the past two years. The  
390 temporal trend in growth of publications suggests genomics studies applied in a  
391 restoration context may surpass the prevalence of genomics in conservation studies.  
392 While the use of genomics in restoration is increasing, this trend might also reflect  
393 increased cross-over between the two disciplines.

394

395 With respect to geography, most conservation genomics studies were undertaken in  
396 North America (n = 36) and Europe (n = 17; Figure 2). These same two continents  
397 were among the least common locations reporting restoration genomics studies  
398 (Europe: n = 4; North America: n = 8; Figure 2). The number of conservation papers  
399 from North America and Europe has generally increased annually, which has not  
400 occurred in restoration genomics papers (Appendix 5). However, the number of  
401 restoration genomics papers from Russia, China, South Asia shows a clear increase,

402 with the number of restoration studies overtaking the number of conservation studies  
403 in 2020 (Appendix 5).

404

405 Across the studies assigned to conservation, restoration, and conservation and  
406 restoration, the majority of articles reported the use of eDNA approaches  
407 (conservation:  $n = 47$ ; restoration:  $n = 33$ , conservation and restoration:  $n = 27$ ), and  
408 a steady increase over time (Figure 3). This genomics approach was most used in  
409 conservation and restoration studies from Russia, China, South Asia ( $n = 27$ ), North  
410 America ( $n = 21$ ), and Europe ( $n = 20$ ; Figure 2). These findings indicate that there  
411 may be broader opportunities in restoration genomics through the appropriate  
412 utilisation of eDNA over population genomics, as suggested in previous studies [39],  
413 but there remains a clear use of population genomics in restoration to inform seed  
414 sourcing practices [8].

415

416 Population genomics was utilised in 53 conservation studies, 1 restoration study, and  
417 8 studies that crossed over between conservation and restoration (Figure 3).  
418 Between 2018-2020, there was a marked increase in the uptake of population  
419 genomics, which was most pronounced in the conservation studies ( $n = 31$ ) and  
420 conservation and restoration studies ( $n = 6$ ; Figure 3). The use of population  
421 genomics in conservation was most evident in studies from North America ( $n = 25$ );  
422 however, we detected no restoration studies from North America that utilised  
423 population genomics (Figure 2). Rather, Latin America ( $n = 4$ ; pooled across  
424 restoration and conservation and restoration) and Oceania ( $n = 3$ ) were the most  
425 common locations to use population genomics in a restoration context.

426

427 *Helping genomics cross the chasm into restoration*

428 A prominent model used to develop a strategy to hasten the market uptake of novel  
429 innovations such as genomics is ‘crossing the chasm’ [40]. The chasm refers to the  
430 gap between early adopters of a new technology and more pragmatic adopters; a  
431 key differentiator between these two groups is their appetite for risk, comfort with  
432 uncertainty, and willingness to try novel solutions [9, 40].

433

434 The strategy first requires identifying what is referred to as a beachhead: a single  
435 application area and/or industry use case where the novel innovation offers a  
436 compelling solution to problems faced in that area. Breed *et al.* [8] proposed that a  
437 compelling application for genomics is using population genomics to inform seed  
438 sourcing practices. Genomics offers critical information that is not easily attainable  
439 using other methods. For example, it can rapidly identify signals of genetic based  
440 adaptations that have the potential to increase resilience of seed stocks to future  
441 environmental change. Breed *et al.* [8] also proposed that eDNA approaches offer  
442 crucial benefits to track important ecological components and interactions during  
443 restoration (e.g., soil microbial communities; plant-pollinator communities). In  
444 addition to these application areas of genomics, beachheads can focus on a  
445 particular industry that faces a critical need to solve a problem or issue for which the  
446 novel technology is uniquely suited. For example, with respect to restoration ecology,  
447 the mining sector has increasingly regulated rehabilitation requirements that place  
448 tremendous pressure on the availability of cost-effective restoration practices [41].  
449 The desire of scholars in our qualitative study to identify use cases where genomics  
450 offers compelling value illustrates the face validity of the ‘crossing the chasm’ model.

451 Matching the value proposition of genomics to a critical application area allows  
452 pragmatists a compelling reason to overcome their uncertainty and move forward.

453

454 The notion of targeting a specific application area in a particular industry to gain  
455 broader market acceptance is somewhat paradoxical: why would a new technology  
456 narrow its focus rather than pursue multiple application areas and industry  
457 applications all at once? The answer lies in both the nature of word-of-mouth  
458 communications--a critical consideration for pragmatic adopters' decision making--as  
459 well as important subtleties in how a new technology is deployed across industries  
460 and applications. Hence, a second consideration in developing a strategy for  
461 genomics to cross the chasm in restoration ecology is to explicitly consider how  
462 word-of-mouth communication might flow between areas within restoration ecology  
463 (e.g., do those who focus on seed sourcing and provenance issues interact regularly  
464 with those who focus on soil microbial communities and ecological monitoring?) as  
465 well as between different industries that face restoration pressures (e.g., do those in  
466 the mining industry share knowledge and insights with those in agriculture and/or  
467 reforestation sectors?). Another consideration is how word-of-mouth networks  
468 operate geographically, both different countries as well as types of ecosystems  
469 (rainforests vs. temperate forests vs. deserts; aquatic vs. terrestrial ecosystems).

470

471 Putting these two considerations together (selecting a beachhead and considering  
472 word-of-mouth communication) results in a strategy that, if implemented correctly,  
473 can build momentum for a new technology. A useful analogy for this strategy is to  
474 view the beachhead like a lead pin in a bowling alley: if hit properly, this lead pin will  
475 knock down adjacent pins behind it (e.g., through the word-of-mouth networks). For

476 example, one possible “bowling alley” could start with using genomics to assess  
477 seed sourcing and transfer zones in the reclamation for degraded mining sites; then  
478 momentum could build on the one hand, to applying genomics to monitor ecological  
479 communities in those reclaimed mining sites, and on the other hand, to using  
480 genomics to inform seed sourcing and transfer zones in a related industry, such as  
481 repairing degraded agricultural ecosystems.

482

483 Finally, all new technologies require additional elements in catalysing market uptake.  
484 First, a communications strategy is required to build awareness about the value  
485 proposition that this new technology has to the identified beachhead, as well as to  
486 educate potential adopters about how to leverage this new technology [42]. Our  
487 qualitative findings highlighted the need for greater education and training with  
488 regard to what genomics is, the types of research questions it can usefully address  
489 today, and generally, building capacity, skills and knowledge. Hence, efforts to build  
490 awareness and capability could include workshops, education, training, and  
491 outreach, again, strategically delivered to a specific industry for a specific application  
492 to build momentum for communication via word-of-mouth networks to related  
493 applications and industries.

494

495 Second, funding for genomics research is equally critical. There is anecdotal  
496 evidence that some areas of restoration practice have the funding, knowledge, and  
497 motivation to use genomics, for example, to understand the impact of mining  
498 rehabilitation practices on soil microbial communities [43, 44]. Other areas of  
499 restoration suffer from insufficient funding, such as large scale restoration efforts and

500 adequate restoration project monitoring [45], and in these cases genomics may not  
501 be easily available or a priority investment.

502

503 Third, most novel technologies require related products and services to function  
504 properly, a concept referred to as the “innovation ecosystem” [46, 47]. For example,  
505 bioinformatics and technological infrastructure are critical components for leveraging  
506 genomics. Even while attention is given to the various genomics tools and  
507 applications, equal attention must be given to properly preparing samples in the field  
508 and laboratory, managing the bioinformatics challenges, and appropriately analysing  
509 and interpreting the data.

510

511 Fourth, as our depth interviews noted, collaboration allows the benefits of bringing  
512 the power of genomics to solving restoration problems while not requiring that all  
513 members of a team be genomics experts. Rather than each person needing to bring  
514 all skills required, interdisciplinary teams are a logical solution can bring together the  
515 unique and disparate skills to a project.

516

## 517 **CONCLUSIONS**

518

519 *“This tool [genomics] allows us to be much more sophisticated in our*  
520 *understanding of ecosystem recovery following restoration” (Scholar*  
521 *7).*

522

523 Genomics offers opportunities to better understand many fundamental issues facing  
524 declining ecosystems, yet it is often a missing tool in the restoration ecologist

525 toolbox. The goal of our study was to identify and understand the barriers slowing  
526 the uptake of genomics in restoration ecology by collecting qualitative data from  
527 semi-structured interviews and conducting a systematic mapping review.

528

529 We identified multiple tensions between experienced genomics scholars and  
530 traditional ecological scholars regarding the field-based training differences,  
531 designing studies and interpreting genomics data, and the need to weigh up the  
532 benefits versus the risks of using genomics compared to traditional approaches. Our  
533 interviews revealed that scholars without genomics experience feel pushed to use  
534 the tool “prematurely” in their view. In contrast, scholars with genomics experience  
535 emphatically emphasized the need to “pump the brakes”, to proceed cautiously in  
536 ascertaining where and how genomics can be usefully applied. These differences  
537 across categories of adopters with respect to perceptions and willingness to leverage  
538 novel technologies such as genomics are well-established in the innovation literature  
539 [9, 40].

540

541 We also identified that scholars were unified on the need for case studies to  
542 demonstrate the benefits and applications of genomics in tackling restoration  
543 problems and for collaboration to overcome barriers to the uptake of genomics.  
544 However, evidence from our systematic mapping review revealed that genomics is  
545 indeed being leveraged to address restoration issues, and in fact, its use has  
546 increased rapidly in the past few years. This increase was mostly facilitated by eDNA  
547 applications, which is by far the most widely used genomics tool, with population  
548 genomics rarely applied to restoration problems. We urge a synthesis of the 70  
549 studies that show use of genomics to address restoration challenges.

550

551 We have proposed a roadmap that explicitly considers the various aspects  
552 necessary for genomics to cross the adoption chasm. For restoration ecologists, this  
553 roadmap requires demonstrating the value of genomics in areas with a well-  
554 established ecological framework rather than applying genomics where the ecology  
555 is less well-understood, providing education, training, and outreach, ensuring funding  
556 for the research, and developing a robust set of ancillary elements (e.g.,  
557 bioinformatics and computing infrastructure) to round out the necessary component  
558 of the innovation ecosystem. With these elements in place, the likelihood of  
559 genomics to address the critical issues facing restoration will be increased.

560



561 **Acknowledgements**

562 The authors wish to thank the interviewees for their insightful discussions that made  
563 this manuscript possible.

564

565 **Declaration of interests**

566 The authors declare no competing interests.

567

568 **Ethics**

569 This project was done under ethics approval by University of Montana's Ethics  
570 Review Board (approval number #144-19, for “Barriers to and Facilitators of  
571 Genomics in Ecological Restoration”) in accordance with the Code of Federal  
572 Regulations, Part 46, section 104(d).

573

574 **Supplementary information**

575 **Appendix 1.** Interview guide

576 **Appendix 2.** Search strategies

577 **Appendix 3.** Inclusion/exclusion flow chart

578 **Appendix 4.** Details of the included studies

579 **Appendix 5.** Frequency of published studies from the systematic mapping review by  
580 geographic region, across time

581 **Box 1. Definitions and inclusion/exclusion criteria**

582

583 *Conservation*: “The protection, care, management and maintenance of ecosystems,  
584 habitats, wildlife species and populations, within or outside of their natural  
585 environments, in order to safeguard the natural conditions for their long-term  
586 permanence” [48].

587

588 *Restoration ecology*: “the science that supports the practice of ecological restoration,  
589 and from other forms of environmental repair in seeking to assist recovery of native  
590 ecosystems and ecosystem integrity” [3].

591

592 *Genomics*: Generated de novo genomic data using modern (i.e., non-Sanger)  
593 sequencing approaches (i.e., high throughput sequencing), or that used genomic  
594 datasets that had already been generated and ran comparative genomic analyses

595

596 Studies were *eligible* for inclusion where they were:

597

- published in English language
- published in full text (e.g., not abstracts only)
- published in a peer-reviewed journal [as per UlrichsWeb™ Global Serials Directory; 49]
- used genomics for either conservation or restoration ecology, or that propose methods that could be applied to conservation or restoration ecology (i.e., methods with potential implications specific to conservation or restoration ecology, or provided genomic data on a target species)

605

606 Studies were *excluded* where they were:

607

- reviews, perspectives, or essays
- studies of plastid genomes (e.g., chloroplast or mitochondria), or
- studies that used genomics to develop microsatellite markers

610

611 **Box 2. Examples of studies that used genomics to answer restoration questions.** We identified 70 studies from our literature  
612 search that used genomic methods in a restoration context. Here we provide details of four examples of these studies, where these  
613 studies include: (A) the earliest eDNA study (and restoration genomics study in general); (B) the equal earliest population genomics  
614 study; (C) a more recent eDNA study that used more advanced molecular methods than typically employed; (D) the only study that  
615 combined both eDNA and population genomics.

616

617 *Ficetola et al.* (A) [37] used eDNA methods in a laboratory environment to demonstrate how this approach could be used to detect  
618 the presence of an invasive frog species in freshwater environments. These findings are important for restoration as detecting  
619 aquatic vertebrate species – whether invasive, rare or common natives – is often an expensive exercise that is challenging in  
620 certain hard to access environments and especially when the organisms are in low abundance.

621

622 *Steane et al.* (B) [50] used population genomics to identify adaptations across the range of a tree species that is commonly used in  
623 restoration plantings. The use of population genomics here helps to inform seed sourcing decisions that take into account the  
624 adaptive variation among populations, which for long-lived plants such as most trees would otherwise require many years of  
625 common-garden field trials.

626

627 *Guo et al.* (C) [51] used eDNA methods in a field environment to determine how the taxonomic and functional gene diversity and  
628 composition of soil microbes had changed after restoration plantings. The monitoring of soil microbial communities in restoration is  
629 important as they provide key ecosystem services (e.g. nutrient cycling) and are a rich source of biodiversity in their own right.  
630 However, microbial communities are impossible to monitor accurately without the assistance of molecular methods since most taxa  
631 are not culturable or easily identifiable. The authors combined a more advanced molecular technique – shotgun metagenomics –  
632 with the commonly-used amplicon sequencing.

633

634 *Dittberner et al.* (D) [52] used a combination of eDNA and population genomics to monitor species hybridisation and population  
635 admixture between populations of two *Arabis* plant species. eDNA was used to identify the two species, and population genomics  
636 was used to determine population admixture. Sometimes plant species are challenging to identify using traditional morphological  
637 approaches and eDNA approach used here can assist in this process. Measuring gene flow and admixture between populations is  
638 nearly extremely challenging without the use of molecular methods, and population genomic methods provide great insight into  
639 these aspects of habitat connectivity and adaptive potential of populations.

**Topic**

**(A) Frog species detection using eDNA from water samples**  
 – Ficetola et al. 2008

**Genomic method**

eDNA

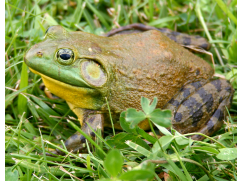

**Taxonomic group**

**Study location**

Laboratory (France)

**Study type**

Laboratory experiment

**Molecular analysis**

Sequencing of fragment of *cyt-b* gene on Roche 454 GS20

| pond | bullfrog presence and relative abundance | water samples positives at least once | positive PCRs |
|------|------------------------------------------|---------------------------------------|---------------|
| 1    | yes-low                                  | 2/3                                   | 2/9           |
| 2    | yes-low                                  | 3/3                                   | 6/9           |
| 3    | yes-low                                  | 2/3                                   | 2/9           |
| 4    | yes-high                                 | 3/3                                   | 8/9           |
| 5    | yes-high                                 | 3/3                                   | 6/9           |
| 6    | yes-high                                 | 3/3                                   | 8/10          |
| 7    | no                                       | 0/3                                   | 0/9           |
| 8    | no                                       | 0/3                                   | 0/9           |
| 9    | no                                       | 0/3                                   | 0/15          |

**Statistics**

Generalized mixed models

**(B) Genetic adaptations in a eucalypt species used in restoration plantings**  
 – Steane et al. 2017

Population genomics

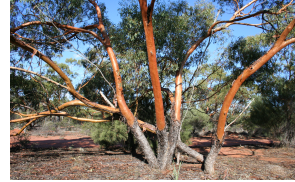

*Eucalyptus loxophleba* ssp. *lissophloia*

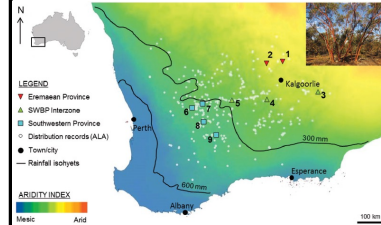

Field observational study

4,851 SNPs via DArTseq (unknown platform)

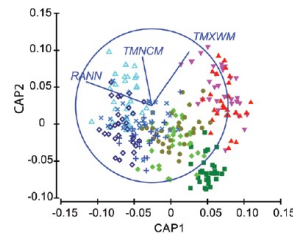

Genetic diversity & genetic-environment associations

**(C) Soil bacterial taxonomic and functional differences with natural revegetation**  
 – Guo et al. 2018

eDNA

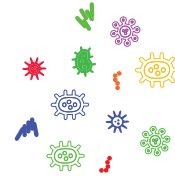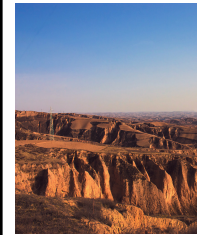

Active “Grain for Green” restoration site, Loess Plateau, China

Field observational study

Shotgun metagenomic sequencing & sequencing of fragment of *16S rRNA* gene on Illumina HiSeq 2500

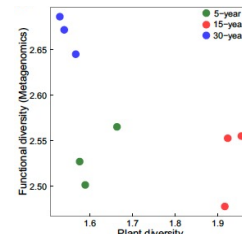

Diversity, linear models, PERMANOVAs

**(D) Monitoring effect of restoration on intraspecific genetic diversity**  
 – Dittberner et al. 2019

eDNA & Population genomics

*Arabis nemorensis* & *A. sagittata*

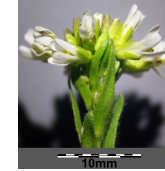

River Rhine floodplain, Germany

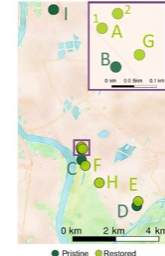

Field experiment

32,880 SNPs via RADseq on Illumina HiSeq & sequencing of fragment of *ITS* gene (unknown platform)

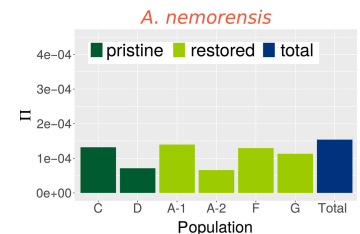

Genetic diversity & admixture

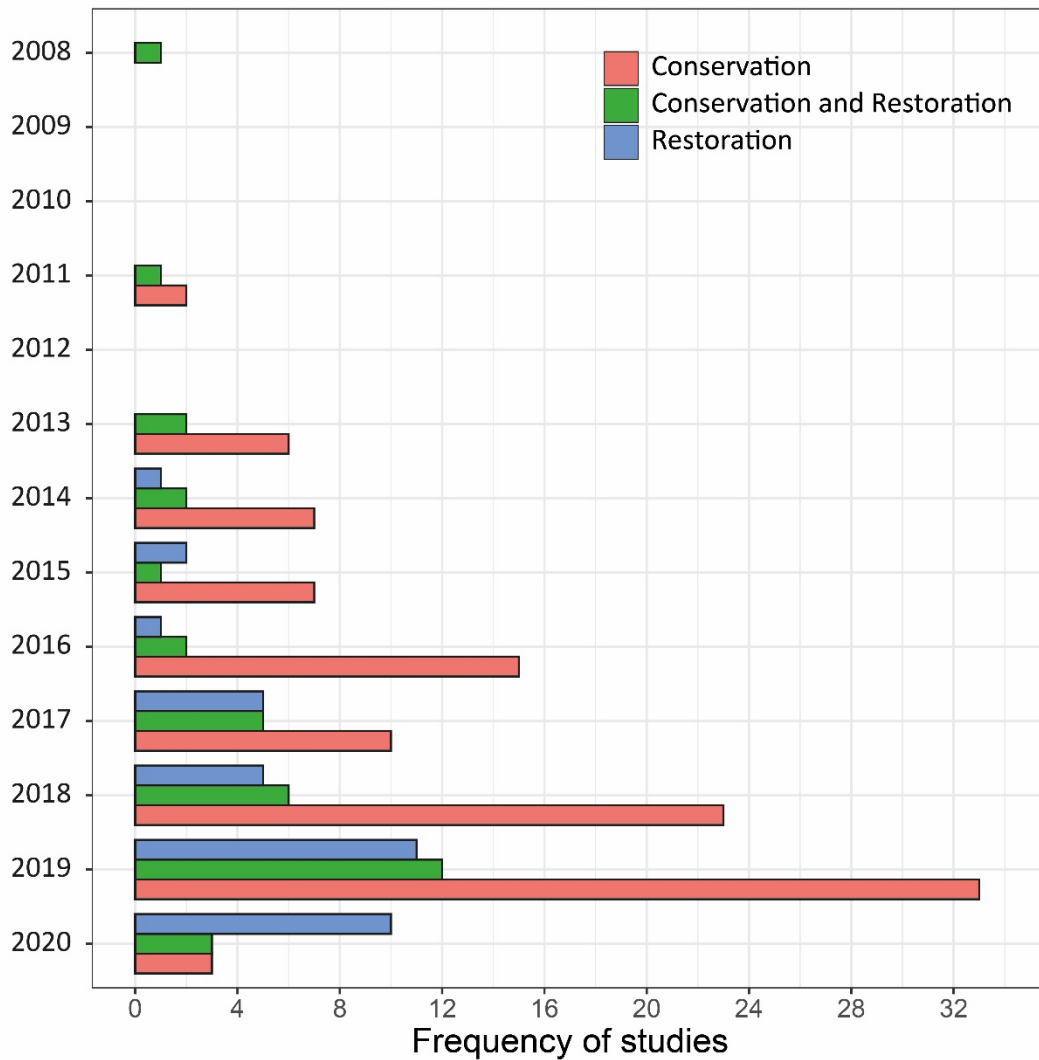

642  
643  
644  
645  
646

**Figure 1.** Frequency of published studies from the systematic mapping review over time, from Jan 2008 to March 1, 2020. Studies were divided into conservation (orange), conservation/restoration (green), and restoration (blue).

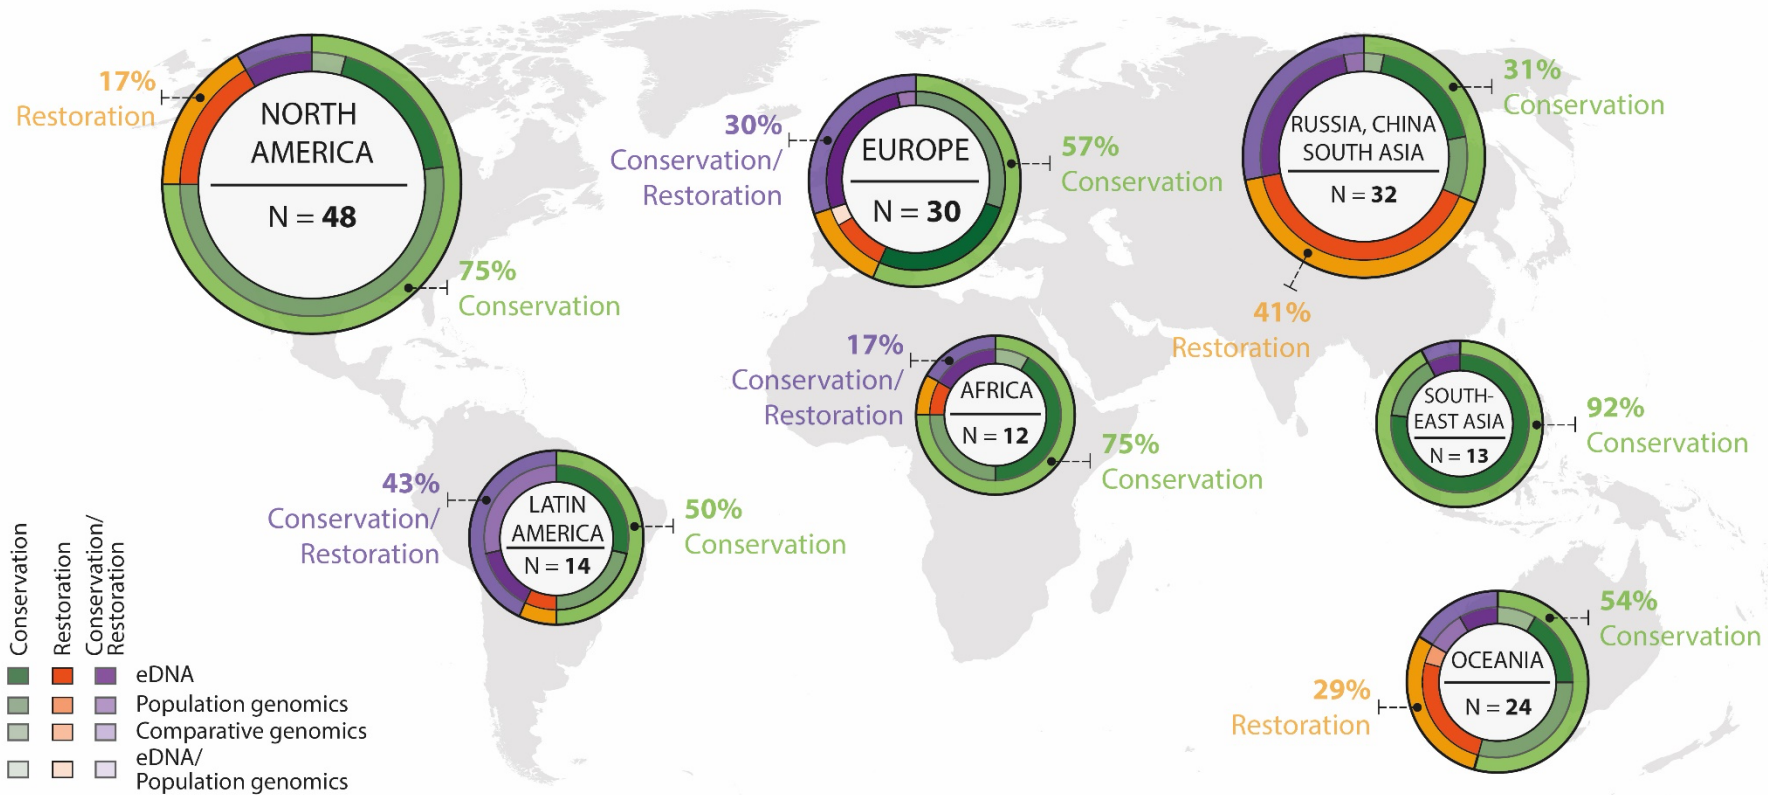

647

648 **Figure 2.** Proportion of studies from the systematic mapping review for seven geographic regions. The outer circle of the donut plot  
 649 corresponds to the total proportion of studies belong to conservation (green), restoration (orange), and conservation/restoration  
 650 (purple). The inner circle of the donut plot shows the break-down of each study into the applied genomics method.

651

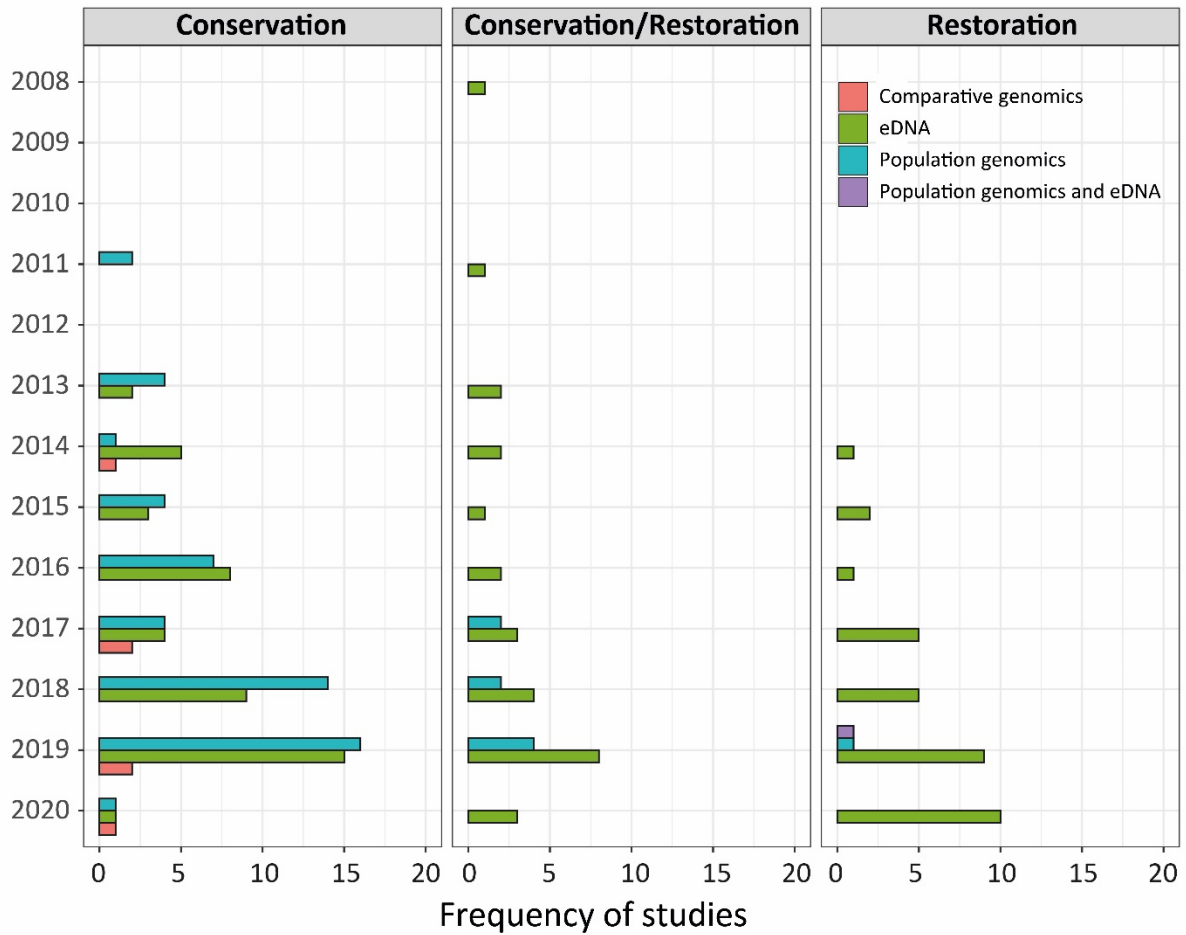

652

653 **Figure 3.** Frequency of published studies from the systematic mapping review  
 654 across time for conservation, conservation/restoration, and restoration. Studies  
 655 within each of these divisions were broken-down to the applied genomics method,  
 656 including comparative genomics (orange), eDNA (green), population genomics  
 657 (blue), and population genomics combined with eDNA (purple).  
 658

659 **Table 1.** Years since PhD, discipline expertise and citation and publication data of  
660 respondents (citation and publication data from Google Scholar [accessed 1 July  
661 2020]).

| Scholar | Years since PhD | Conservation or restoration | Genomics used in Research | Citations    | Publications |
|---------|-----------------|-----------------------------|---------------------------|--------------|--------------|
| 1       | >30             | C                           | Y                         | >10,001      | >100         |
| 2       | >30             | R                           | N                         | >10,001      | >100         |
| 3       | >30             | R                           | N                         | >10,001      | >100         |
| 4       | >30             | Both                        | Y                         | 5,001-10,000 | >100         |
| 5       | 10-29 years     | Both                        | Y                         | 5,001-10,000 | 50-100       |
| 6       | 10-29 years     | R                           | N                         | 1,500-5,000  | 50-100       |
| 7       | 10-29 years     | R                           | Y                         | 501-1,499    | 50-100       |
| 8       | <10 years       | C                           | Y                         | 1,500-5,000  | 50-100       |
| 9       | <10 years       | Both                        | Y                         | <500         | <49          |

662



## 663 REFERENCES

- 664 [1] Gibbs, H. K. & Salmon, J. M. 2015 Mapping the world's degraded lands. *Appl. Geog.* **57**, 12-21.  
665 (DOI:10.1016/j.apgeog.2014.11.024).
- 666 [2] Corlett, R. T. 2015 The Anthropocene concept in ecology and conservation. *Trends Ecol. Evol.* **30**,  
667 36-41. (DOI:10.1016/j.tree.2014.10.007).
- 668 [3] Gann, G. D., McDonald, T., Walder, B., Aronson, J., Nelson, C. R., Jonson, J., Hallett, J. G.,  
669 Eisenberg, C., Guariguata, M. R. & Liu, J. 2019 International principles and standards for the practice  
670 of ecological restoration. *Restor. Ecol.* **27**, S1-S46. (DOI:10.1111/rec.13035).
- 671 [4] Verdone, M. & Seidl, A. 2017 Time, space, place, and the Bonn Challenge global forest restoration  
672 target. *Restor. Ecol.* **25**, 903-911. (DOI:10.1111/rec.12512).
- 673 [5] Perring, M. P., Standish, R. J., Price, J. N., Craig, M. D., Erickson, T. E., Ruthrof, K. X., Whiteley,  
674 A. S., Valentine, L. E. & Hobbs, R. J. 2015 Advances in restoration ecology: rising to the challenges of  
675 the coming decades. *Ecosphere* **6**. (DOI:10.1890/ES15-00121.1).
- 676 [6] Perring, M. P., Erickson, T. E. & Brancalion, P. H. 2018 Rocketing restoration: enabling the  
677 upscaling of ecological restoration in the Anthropocene. *Restor. Ecol.* **26**, 1017-1023.  
678 (DOI:10.1111/rec.12871).
- 679 [7] Suding, K., Higgs, E., Palmer, M., Callicott, J. B., Anderson, C. B., Baker, M., Gutrich, J. J.,  
680 Hondula, K. L., LaFevor, M. C., Larson, B. M. H., et al. 2015 Committing to ecological restoration.  
681 *Science* **348**, 638-640. (DOI:10.1126/science.aaa4216).
- 682 [8] Breed, M. F., Harrison, P., Blyth, C., Byrne, M., Gaget, V., Gellie, N., Groom, S., Hodgson, R.,  
683 Mills, J., Prowse, T., et al. 2019 The potential of genomics for restoring ecosystems and biodiversity.  
684 *Nat. Rev. Genet.* **20**, 615-628. (DOI:10.1038/s41576-019-0152-0).
- 685 [9] Rogers, E. M. 2010 *Diffusion of innovations*, Simon and Schuster.
- 686 [10] Kuhn, T. S. 2012 *The structure of scientific revolutions*, University of Chicago press.
- 687 [11] Christensen, C. 2013 *The innovator's dilemma: when new technologies cause great firms to fail*,  
688 Harvard Business Review Press.
- 689 [12] Sood, A. & Tellis, G. J. 2005 Technological evolution and radical innovation. *J. Marketing* **69**,  
690 152-168. (DOI:10.1509/jmkg.69.3.152.66361).
- 691 [13] Johansson, F. 2006 *Medici effect: What you can learn from elephants and epidemics?*, Harvard  
692 Business Press.
- 693 [14] Allendorf, F. W., Hohenlohe, P. A. & Luikart, G. 2010 Genomics and the future of conservation  
694 genetics. *Nat. Rev. Genet.* **11**, 697-709. (DOI:10.1038/nrg2844).
- 695 [15] Steiner, C. C., Putnam, A. S., Hoeck, P. E. & Ryder, O. A. 2013 Conservation genomics of  
696 threatened animal species. *Ann. Rev. Animal Biosci.* **1**, 261-281. (DOI:10.1146/annurev-animal-  
697 031412-103636).
- 698 [16] Garner, B. A., Hand, B. K., Amish, S. J., Bernatchez, L., Foster, J. T., Miller, K. M., Morin, P. A.,  
699 Narum, S. R., O'Brien, S. J. & Roffler, G. 2016 Genomics in conservation: case studies and bridging  
700 the gap between data and application. *Trends Ecol. Evol.* **31**, 81-83.  
701 (DOI:10.1016/j.tree.2015.10.009).
- 702 [17] Hendricks, S., Anderson, E. C., Antao, T., Bernatchez, L., Forester, B. R., Garner, B., Hand, B.  
703 K., Hohenlohe, P. A., Kardos, M. & Koop, B. 2018 Recent advances in conservation and population  
704 genomics data analysis. *Evol. Appl.* **11**, 1197-1211. (DOI:10.1111/eva.12659).
- 705 [18] Romiguier, J., Gayral, P., Ballenghien, M., Bernard, A., Cahais, V., Chenuil, A., Chiari, Y., Derrat,  
706 R., Duret, L. & Faivre, N. 2014 Comparative population genomics in animals uncovers the  
707 determinants of genetic diversity. *Nature* **515**, 261-263. (DOI:10.1038/nature13685).
- 708 [19] Shafer, A. B., Wolf, J. B., Alves, P. C., Bergström, L., Bruford, M. W., Brännström, I., Colling, G.,  
709 Dalen, L., De Meester, L. & Ekblom, R. 2015 Genomics and the challenging translation into  
710 conservation practice. *Trends Ecol. Evol.* **30**, 78-87. (DOI:10.1016/j.tree.2014.11.009).
- 711 [20] Funk, W. C., McKay, J. K., Hohenlohe, P. A. & Allendorf, F. W. 2012 Harnessing genomics for  
712 delineating conservation units. *Trends Ecol. Evol.* **27**, 489-496. (DOI:10.1016/j.tree.2012.05.012).
- 713 [21] Thomsen, P. F. & Willerslev, E. 2015 Environmental DNA - An emerging tool in conservation for  
714 monitoring past and present biodiversity. *Biol. Conserv.* **183**, 4-18.  
715 (DOI:10.1016/j.biocon.2014.11.019).
- 716 [22] Miller, B. P., Sinclair, E. A., Menz, M. H. M., Elliott, C. P., Bunn, E., Commander, L. E., Dalziell,  
717 E., David, E., Davis, B., Erickson, T. E., et al. 2017 A framework for the practical science necessary to  
718 restore sustainable, resilient, and biodiverse ecosystems. *Restor. Ecol.* **25**, 605-617.  
719 (DOI:10.1111/rec.12475).
- 720 [23] Corlett, R. T. 2017 A bigger toolbox: biotechnology in biodiversity conservation. *Trends*  
721 *Biotechnol.* **35**, 55-65. (DOI:10.1016/j.tibtech.2016.06.009).

- 722 [24] Lindlof, T. R. & Taylor, B. C. 2002 Asking, listening, and telling. *Qual. Comm. Res. Meth.* **2**, 170-  
723 208.
- 724 [25] Glaser, B. G., Strauss, A. L. & Strutzel, E. 1968 The discovery of grounded theory; strategies for  
725 qualitative research. *Nursing Res.* **17**, 364.
- 726 [26] Moon, K., Blackman, D., Brewer, T. D. & Sarre, S. D. 2017 Environmental governance for urgent  
727 and uncertain problems. *Biol. Invasions* **19**, 785-797. (DOI:10.1007/s10530-016-1351-7).
- 728 [27] Metcalf, E. C., Mohr, J. J., Yung, L., Metcalf, P. & Craig, D. 2015 The role of trust in restoration  
729 success: public engagement and temporal and spatial scale in a complex social-ecological system.  
730 *Restor. Ecol.* **23**, 315-324. (DOI:10.1111/rec.12188).
- 731 [28] Creswell, J. W. & Creswell, J. D. 2017 *Research design: Qualitative, quantitative, and mixed*  
732 *methods approaches*, Sage publications.
- 733 [29] Bowen, G. A. 2008 Naturalistic inquiry and the saturation concept: a research note. *Qual. Res.* **8**,  
734 137-152. (DOI:10.1177/1468794107085301).
- 735 [30] O'Reilly, M. & Parker, N. 2013 'Unsatisfactory Saturation': a critical exploration of the notion of  
736 saturated sample sizes in qualitative research. *Qualitative Research* **13**, 190-197.  
737 (DOI:10.1177/1468794112446106).
- 738 [31] McCracken, G. 1988 *The long interview*, Sage.
- 739 [32] Patterson, M. E. & Williams, D. R. 2002 Collecting and analyzing qualitative data: Hermeneutic  
740 principles, methods and case examples. In *Advances in Tourism Applications Series* (p. 127.  
741 Champaign, IL, USA, Sagamore Publishing.
- 742 [33] Aronson, J. 1994 A pragmatic view of thematic analysis. *Qual. Rep.* (DOI:10.46743/2160-  
743 3715/1995.2069).
- 744 [34] Grant, M. J. & Booth, A. 2009 A typology of reviews: an analysis of 14 review types and  
745 associated methodologies. *Health Info. Librar. J.* **26**, 91-108. (DOI:10.1111/j.1471-  
746 1842.2009.00848.x).
- 747 [35] Ellegren, H. 2014 Genome sequencing and population genomics in non-model organisms.  
748 *Trends Ecol. Evol.* **29**, 51-63. (DOI:10.1016/j.tree.2013.09.008).
- 749 [36] McLevey, J., Graham, A. V., McIlroy-Young, R., Browne, P. & Plaisance, K. S. 2018  
750 Interdisciplinarity and insularity in the diffusion of knowledge: an analysis of disciplinary boundaries  
751 between philosophy of science and the sciences. *Scientometrics* **117**, 331-349.  
752 (DOI:10.1007/s11192-018-2866-8).
- 753 [37] Ficetola, G. F., Miaud, C., Pompanon, F. & Taberlet, P. 2008 Species detection using  
754 environmental DNA from water samples. *Biol. Lett.* **4**, 423-425. (DOI:10.1098/rsbl.2008.0118).
- 755 [38] Anderson, S. C., Elsen, P. R., Hughes, B. B., Tonietto, R. K., Bletz, M. C., Gill, D. A., Holgerson,  
756 M. A., Kuebbing, S. E., McDonough MacKenzie, C. & Meek, M. H. 2021 Trends in ecology and  
757 conservation over eight decades. *Front. Ecol. Environ.* (DOI:10.1002/fee.2320).
- 758 [39] Williams, A. V., Nevill, P. G. & Krauss, S. L. 2014 Next generation restoration genetics:  
759 applications and opportunities. *Trends Plant Sci.* **19**, 529-537. (DOI:10.1016/j.tplants.2014.03.011).
- 760 [40] Moore, G. A. 2014 *Crossing the chasm: Marketing and selling disruptive products to mainstream*  
761 *customers*. 3rd Edition ed. New York, Harper Collins.
- 762 [41] Manero, A., Kragt, M., Standish, R., Miller, B., Jasper, D., Boggs, G. & Young, R. 2020 A  
763 framework for developing completion criteria for mine closure and rehabilitation. *J. Env. Manag.* **273**,  
764 111078. (DOI:10.1016/j.jenvman.2020.111078).
- 765 [42] Mohr, J. J., Sengupta, S. & Slater, S. 2010 *Marketing of high-technology products & innovations*.  
766 3rd Edition ed. New Jersey, Prentice Hall.
- 767 [43] Wei, Z., Hao, Z., Li, X., Guan, Z., Cai, Y. & Liao, X. 2019 The effects of phytoremediation on soil  
768 bacterial communities in an abandoned mine site of rare earth elements. *Sci. Total Environ.* **670**, 950-  
769 960. (DOI:10.1016/j.scitotenv.2019.03.118).
- 770 [44] Ezeokoli, O. T., Bezuidenhout, C. C., Maboeta, M. S., Khasa, D. P. & Adeleke, R. A. 2020  
771 Structural and functional differentiation of bacterial communities in post-coal mining reclamation soils  
772 of South Africa: bioindicators of soil ecosystem restoration. *Scien. Rep.* **10**, 1-14.  
773 (DOI:10.1038/s41598-020-58576-5).
- 774 [45] Rohr, J. R., Bernhardt, E. S., Cadotte, M. W. & Clements, W. H. 2018 The ecology and  
775 economics of restoration. *Ecol. Soc.* **23**. (DOI:10.5751/ES-09876-230215).
- 776 [46] Möller, K. & Halinen, A. 2017 Managing business and innovation networks—From strategic nets  
777 to business fields and ecosystems. *Ind. Marget. Manage.* **67**, 5-22.  
778 (DOI:10.1016/j.indmarman.2017.09.018).
- 779 [47] Adner, R. 2006 Match your innovation strategy to your innovation ecosystem. *Harvard Business*  
780 *Rev.* **84**, 98.

- 781 [48] IUCN. 2020 IUCN Definitions - English. In [https://www.iucn.org/sites/dev/files/iucn-glossary-of-](https://www.iucn.org/sites/dev/files/iucn-glossary-of-definitions_en.pdf)  
782 [definitions\\_en.pdf](https://www.iucn.org/sites/dev/files/iucn-glossary-of-definitions_en.pdf) (IUCN).
- 783 [49] Ulrichsweb.com<sup>TM</sup>. 2020 UlrichsWeb<sup>TM</sup> Global Serials Directory. (ProQuest LLC).
- 784 [50] Steane, D. A., Mclean, E. H., Potts, B. M., Prober, S. M., Stock, W. D., Stylianou, V. M.,  
785 Vaillancourt, R. E. & Byrne, M. 2017 Evidence for adaptation and acclimation in a widespread  
786 eucalypt of semi-arid Australia. *Biol. J. Linn. Soc.* **121**, 484-500. (DOI:10.1093/biolinnean/blw051).
- 787 [51] Guo, Y., Chen, X., Wu, Y., Zhang, L., Cheng, J., Wei, G. & Lin, Y. 2018 Natural revegetation of a  
788 semiarid habitat alters taxonomic and functional diversity of soil microbial communities. *Sci. Total*  
789 *Environ.* **635**, 598-606. (DOI:10.1016/j.scitotenv.2018.04.171).
- 790 [52] Dittberner, H., Becker, C., Jiao, W. B., Schneeberger, K., Hölzel, N., Tellier, A. & de Meaux, J.  
791 2019 Strengths and potential pitfalls of hay transfer for ecological restoration revealed by RAD-seq  
792 analysis in floodplain *Arabis* species. *Mol. Ecol.* **28**, 3887-3901. (DOI:10.1111/mec.15194).
- 793
